# Supplementary material for: Structural basis for substrate specificity and catalysis of α1,6-fucosyltransferase
Source: PubMed Central journal article supplement (PMC7033129; doi:10.1038/s41467-020-14794-z), 2020-02-20
Supplement: 41467_2020_14794_MOESM1_ESM.pdf [file 41467_2020_14794_MOESM1_ESM.pdf]

## **Supplementary Information**

### **Structural basis for substrate specificity and catalysis of $\alpha$ 1,6- fucosyltransferase**

**Ana García-García, Laura Ceballos-Laita, et al.**

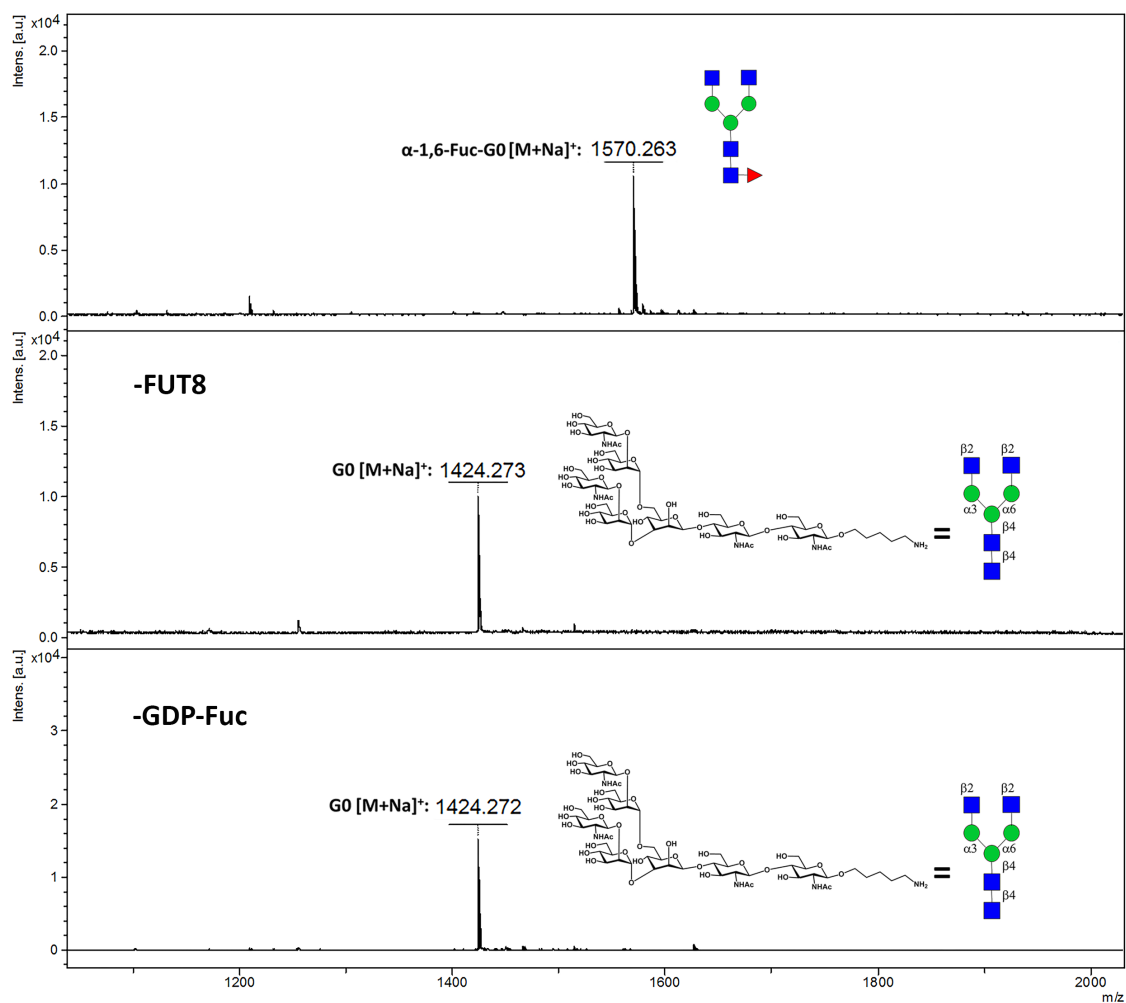

**Supplementary Figure 1. Activity of recombinant *HsFUT8* on 5-aminopentyl G0.** MALDI-TOF spectrum showing the introduction of fucose on 5-aminopentyl glycan G0 by the action of recombinant *HsFUT8* (top). Control experiments lacking recombinant *HsFUT8* (middle) and without GDP-Fuc (bottom) showing the presence of unaltered 5-aminopentyl G0. These experiments were performed in duplicate.

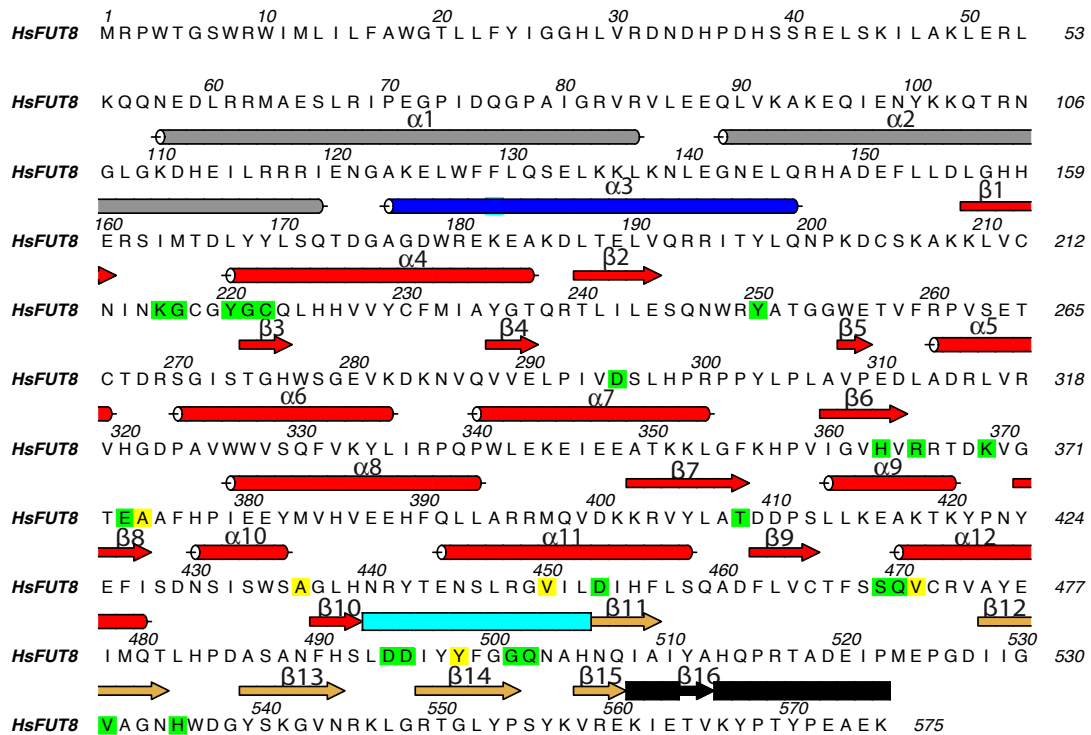

**Supplementary Figure 2. Sequence of HsFUT8 depicting the different domains.** Secondary structure elements are shown above the sequence ( $\alpha$ -helices and  $\beta$ -strands). The secondary structure elements are colored in grey, red and orange for the coiled-coil domain, the catalytic domain and the SH3 domain, respectively. The  $\alpha$ 3 that connects the coiled-coil domain and the catalytic domain is colored in blue. The loop  $\beta$ 10- $\beta$ 11 (indicated as a rectangle) that connects the catalytic domain with the SH3 domain is colored in aquamarine. The C-terminal loop (indicated as a rectangle) and the  $\beta$ 16 are colored in black. Residues interacting by hydrogen bonds with the ligands are highlighted in green while residues interacting by hydrophobic interactions with G0 and GDP are highlighted in yellow.

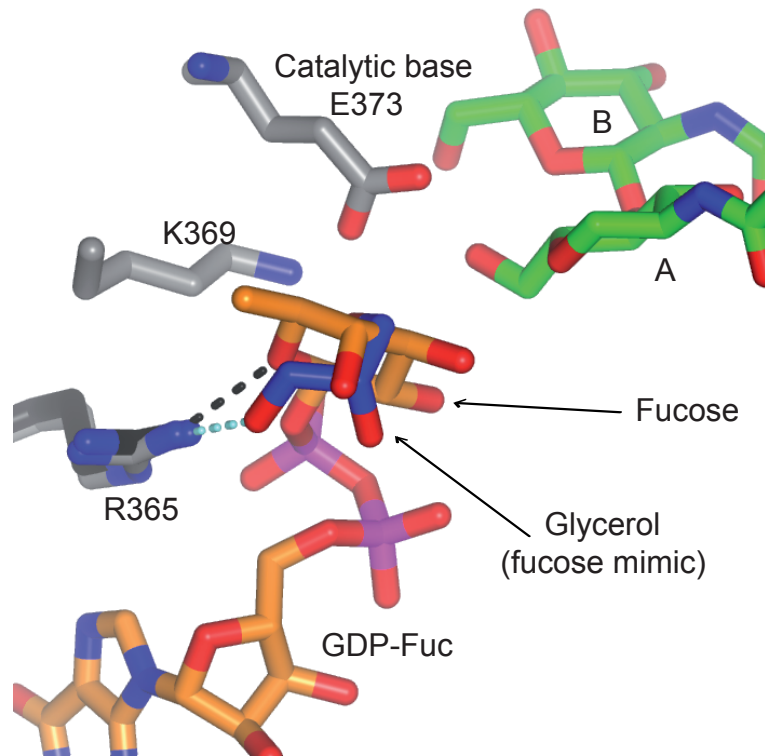

**Supplementary Figure 3. Superposition of the *HsFUT8*-GDP-G0 and *HsFUT8*-GDP-Fuc-G0 structures.** GDP-Fuc, G0 and glycerol are shown as orange, green and blue carbon atoms, respectively. *HsFUT8*-GDP-Fuc-G0 complex was derived from molecular mechanics calculations. GDP-Fuc coordinates were obtained from the crystal structure of *CePoFUT1* complexed to GDP-Fuc (PDB entry: 3ZY6) and the resulting complex was further minimized as described in Methods. Note that GDP from the *HsFUT8*-GDP-G0 complex is not shown for illustration purposes. Only the conserved hydrogen bonds conserved between fucose/glycerol and Arg365 are shown. Hydrogen bond interactions are shown as dotted black and aquamarine lines for GDP-Fuc and Arg365, and glycerol and Arg365, respectively.

**Supplementary Table 1. Additional glycan structures included on microarrays.**

|                                                                                     |              |                                                                        |                            |
|-------------------------------------------------------------------------------------|--------------|------------------------------------------------------------------------|----------------------------|
|    | <b>GL46</b>  | GlcNAc $\beta$ 1-2(GlcNAc $\beta$ 1-4)Man $\alpha$ -sp                 |                            |
|    | <b>GL81</b>  | GlcNAc $\beta$ 1-4GlcNAc $\beta$ -sp                                   |                            |
|    | <b>GL89</b>  | Neu5Ac $\alpha$ 2-3Gal $\beta$ 1-4(Fuc $\alpha$ 1-3)GlcNAc $\beta$ -sp | SialylLeX                  |
|    | <b>GL91</b>  | Gal $\beta$ 1-4(Fuc $\alpha$ 1-3)GlcNAc $\beta$ -sp                    | LeX                        |
|    | <b>GL93</b>  | GalNAc $\beta$ 1-4GlcNAc $\beta$ -sp                                   | LDN                        |
|    | <b>GL94</b>  | GalNAc $\beta$ 1-4(Fuc $\alpha$ 1-3)GlcNAc $\beta$ -sp                 |                            |
|    | <b>GL95</b>  | GlcNAc $\beta$ -sp                                                     |                            |
|    | <b>GL96</b>  | GlcNAc $\beta$ 1-4GlcNAc $\beta$ 1-4GlcNAc $\beta$ -sp                 |                            |
|    | <b>GL97</b>  | GalNAc $\beta$ 1-4Gal $\beta$ 1-4GlcNAc $\beta$ -sp                    | GG3                        |
|    | <b>GL98</b>  | Gal $\beta$ 1-4Glc $\beta$ -sp                                         | lactose                    |
|   | <b>GL99</b>  | Man $\alpha$ 1-2Man $\alpha$ 1-2Man $\alpha$ -sp                       |                            |
|  | <b>GL100</b> | Xyl $\beta$ -sp                                                        |                            |
|  | <b>GL101</b> | Glc $\beta$ -sp                                                        |                            |
|  | <b>GL102</b> | Gal $\beta$ -sp                                                        |                            |
|  | <b>GL103</b> | Fuc $\alpha$ -sp                                                       |                            |
|  | <b>GL104</b> | Gal $\alpha$ 1-3GalNAc $\alpha$ -sp                                    |                            |
|  | <b>GL105</b> | Gal $\alpha$ 1-2Gal $\beta$ -sp                                        |                            |
|  | <b>GL106</b> | Gal $\alpha$ 1-3Gal $\beta$ -sp                                        |                            |
|  | <b>GL107</b> | Fuc $\alpha$ 1-2Gal $\beta$ -sp                                        |                            |
|  | <b>GL108</b> | Fuc $\alpha$ 1-3GlcNAc $\beta$ -sp                                     |                            |
|  | <b>GL109</b> | Fuc $\alpha$ 1-4GlcNAc $\beta$ -sp                                     |                            |
|  | <b>GL110</b> | Gal $\alpha$ 1-3Gal $\beta$ 1-4Glc $\beta$ -sp <sup>4</sup>            |                            |
|  | <b>GL111</b> | Gal $\alpha$ 1-3Gal $\beta$ 1-4GlcNAc $\beta$ -sp                      |                            |
|  | <b>GL112</b> | Fuc $\alpha$ 1-2Gal $\beta$ 1-3GlcNAc $\beta$ -sp                      | Le <sup>d</sup> (H type 1) |
|  | <b>GL113</b> | Fuc $\alpha$ 1-2Gal $\beta$ 1-3GalNAc $\alpha$ -sp                     | H (type 3)                 |
|  | <b>GL114</b> | Fuc $\alpha$ 1-2Gal $\beta$ 1-4Glc $\beta$ -sp                         | H (type 6)                 |
|  | <b>GL115</b> | Gal $\beta$ 1-3(Fuc $\alpha$ 1-4)GlcNAc $\beta$ -sp                    | Le <sup>a</sup>            |
|  | <b>GL116</b> | GalNAc $\alpha$ 1-3(Fuc $\alpha$ 1-2)Gal $\beta$ -sp                   | A <sub>tri</sub>           |
|  | <b>GL117</b> | Gal $\alpha$ 1-3(Fuc $\alpha$ 1-2)Gal $\beta$ -sp                      | B <sub>tri</sub>           |
|  | <b>GL118</b> | Neu5Ac $\alpha$ 2-3Gal $\beta$ 1-4Glc $\beta$ -sp                      | 3'SL                       |
|  | <b>GL119</b> | Neu5Ac $\alpha$ 2-3Gal $\beta$ 1-4GlcNAc $\beta$ -sp                   | 3'SLN                      |
|  | <b>GL120</b> | Neu5Ac $\alpha$ 2-6Gal $\beta$ 1-4GlcNAc $\beta$ -sp                   | 6'SL                       |
|  | <b>GL121</b> | Fuc $\alpha$ 1-2Gal $\beta$ 1-3(Fuc $\alpha$ 1-4)GlcNAc $\beta$ -sp    | Le <sup>b</sup>            |
|  | <b>GL122</b> | Fuc $\alpha$ 1-2Gal $\beta$ 1-3(Fuc $\alpha$ 1-3)GlcNAc $\beta$ -sp    | Le <sup>v</sup>            |
|  | <b>GL123</b> | Neu5Ac $\alpha$ 2-3Gal $\beta$ 1-3(Fuc $\alpha$ 1-4)GlcNAc $\beta$ -sp | SialLe <sup>a</sup>        |
|  | <b>GL124</b> | GlcNAc $\beta$ 1-4(Fuc $\alpha$ 1-6)GlcNAc $\beta$ -sp                 | FucGlcNAc <sub>2</sub>     |

**Supplementary Table 2. DNA sequence of the codon optimized construct for expression of *HsFUT8*.** Note that the nucleotides sequences for the KpnI and XhoI endonucleases are highlighted in red and blue, respectively. The stop codon nucleotides are highlighted in green.

GGTACC CGGATACCAGAAGGCCCTATTGATCAGGGGCCAGCTATAGGAAGA  
GTACGCGTTTTAGAAGAGCAGCTTGTTAAGGCCAAAGAACAGATTGAAAAT  
TACAAGAAACAGACCAGAAATGGTCTGGGGAAGGATCATGAAATCCTGAG  
GAGGAGGATTGAAAATGGAGCTAAAGAGCTCTGGTTTTTCCTACAGAGTGA  
ATTGAAGAAATTAAGA AACTTAGAAGGAAATGAACTCCAAAGACATGCAG  
ATGAATTTCTTTGGATTTAGGACATCATGAAAGGTCTATAATGACGGATCT  
ATACTACCTCAGTCAGACAGATGGAGCAGGTGATTGGCGGGAAAAAGAGG  
CCAAAGATCTGACAGA AACTGGTTCAGCGGAGAATAACATATCTTCAGAATC  
CCAAGGACTGCAGCAAAGCCAAAAAGCTGGTGTGTAATATCAACAAAGGCT  
GTGGCTATGGCTGTCAGCTCCATCATGTGGTCTACTGCTTCATGATTGCATA  
TGGCACCCAGCGAACACTCATCTTGGAATCTCAGAATTGGCGCTATGCTACT  
GGTGGATGGGAGACTGTATTTAGGCCTGTAAGTGAGACATGCACAGACAGA  
TCTGGCATCTCCACTGGACACTGGTCAGGTGAAGTGAAGGACAAAAATGTT  
CAAGTGGTCGAGCTTCCCATTGTAGACAGTCTTCATCCCCGTCCTCCATATT  
TACCCTTGGCTGTACCAGAAGACCTCGCAGATCGACTTGTACGAGTGCATG  
GTGACCCTGCAGTGTGGTGGGTGTCTCAGTTTGTCAAATACTTGATCCGCCC  
ACAGCCTTGGCTAGAAAAAGAAATAGAAGAAGCCACCAAGAAGCTTGGCTT  
CAAACATCCAGTTATTGGAGTCCATGTCAGACGCACAGACAAAGTGGGAAC  
AGAAGCTGCCTTCCATCCCATTGAAGAGTACATGGTGCATGTTGAAGAACA  
TTTTCAGCTTCTTGCACGCAGAATGCAAGTGGACAAAAAAGAGTGTATTT  
GGCCACAGATGACCCTTCTTTATTAAAGGAGGCCAAAAACAAAGTACCCCAA  
TTATGAATTTATTAGTGATAACTCTATTTCTGGTCAGCTGGACTGCACAAT  
CGATACACAGAAAATCACTTCGTGGAGTGATCCTGGATATACATTTTCTCT  
CTCAGGCAGACTTCCTAGTGTGTA CTTTTTCATCCCAGGTCTGTCGAGTTGCT  
TATGAAATTATGCAAACACTACATCCTGATGCCTCTGCAA ACTTCCATTCTT  
TAGATGACATCTACTATTTTGGGGGCCAGAATGCCACAATCAAATTGCCAT  
TTATGCTCACCAACCCCGAACTGCAGATGAAATTCCCATGGAACCTGGAGA  
TATCATTGGTGTGGCTGGAAATCATTGGGATGGCTATTCTAAAGGTGTCAAC  
AGGAAATTGGGAAGGACGGGCCTATATCCCTCCTACAAAGTTTCGAGAGAAG  
ATAGAAACGGTCAAGTACCCACATATCCTGAGGCTGAGAAAT **A**ACTCGAG **B**
