# Supplementary material for: Structural basis for substrate specificity and catalysis of α1,6-fucosyltransferase
Source: PubMed Central journal article supplement (PMC7033129; doi:10.1038/s41467-020-14794-z), 2020-02-20
Supplement: 41467_2020_14794_MOESM2_ESM.pdf [file 41467_2020_14794_MOESM2_ESM.pdf]

**Editorial Note:** This manuscript has been previously reviewed at another journal that is not operating a transparent peer review scheme. The manuscript was considered suitable for publication without further review at *Nature Communications*.
